# Supplementary figures and images for: Striped occipital cortex and intragyral hemorrhage: Novel magnetic resonance imaging markers for cerebral amyloid angiopathy
Source: PubMed Central journal article supplement — Int J Stroke. 2021 Feb 3;16(9):1031–8. doi: 10.1177/1747493021991961 (PMC8669214; doi:10.1177/1747493021991961), 2021-02-03

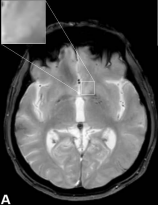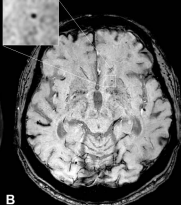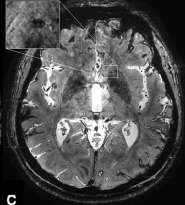

Supplement: sj-pdf-1-wso-10.1177_1747493021991961.pdf [file sj-pdf-1-wso-10.1177_1747493021991961.pdf]
